# Supplementary material for: Hydrothermal synthesis of benzothiazole–carboxylic cadmium(ii) coordination networks: pH-controlled topologies and compositional distributions
Source: Royal Society of Chemistry journal article supplement (doi:10.1039/c2ce26559a), 2012-10-31
Supplement: c2ce26559a.pdf [file c2ce26559a.pdf]

## Supporting Information

### Hydrothermal Synthesis of Benzothiazole-carboxylic Cadmium(II) Coordination

#### Networks: pH-controlled topologies and compositional distributions

Hai-Yang Yu<sup>†</sup>, Ke-Ke Zhang<sup>†</sup>, Mei-Jin Lin<sup>†</sup>, Dan Gao, Xin Fang<sup>\*†</sup>, Ming-Dong Huang<sup>†‡</sup> and Jun-Dong Wang<sup>†</sup>

<sup>†</sup> College of Chemistry and Chemical Engineering, Fuzhou University, Fuzhou, Fujian, 350108 P. R. China, <sup>‡</sup> State Key Laboratory of Structural Chemistry, Fujian Institute of Research on Structure of Matter, Chinese Academy of Science, Fuzhou, Fujian, 350108 P. R.

China

**Table S1.** Selected bond lengths [Å] and angles [°] for compounds **1** and **2**

|          |                                                                          |            |                                              |            |                                              |            |  |
|----------|--------------------------------------------------------------------------|------------|----------------------------------------------|------------|----------------------------------------------|------------|--|
| <b>1</b> | Cd(1)-O(2)                                                               | 2.209(3)   | Cd(1)-O(4)                                   | 2.276(3)   | Cd(1)-O(3)                                   | 2.424(3)   |  |
|          | Cd(1)-N(3)                                                               | 2.279(3)   | Cd(1)-O(1)                                   | 2.298(3)   | Cd(1)-C(17)                                  | 2.695(3)   |  |
|          | O(2)-Cd(1)-O(4)                                                          | 107.50(11) | O(2)-Cd(1)-N(3)                              | 105.16(10) | O(2)-Cd(1)-C(17)                             | 126.92(11) |  |
|          | O(4)-Cd(1)-N(3)                                                          | 144.94(10) | O(2)-Cd(1)-O(1)                              | 112.48(10) | N(3)-Cd(1)-C(17)                             | 118.25(10) |  |
|          | O(4)-Cd(1)-O(1)                                                          | 92.30(11)  | N(3)-Cd(1)-O(1)                              | 86.76(11)  | O(3)-Cd(1)-C(17)                             | 27.95(10)  |  |
|          | O(2)-Cd(1)-O(3)                                                          | 136.90(11) | O(4)-Cd(1)-O(3)                              | 55.45(9)   | O(4)-Cd(1)-C(17)                             | 27.60(10)  |  |
|          | N(3)-Cd(1)-O(3)                                                          | 91.55(9)   | O(1)-Cd(1)-O(3)                              | 107.81(10) | O(1)-Cd(1)-C(17)                             | 99.58(11)  |  |
| <b>2</b> | Cd(1)-N(1)                                                               | 2.270(4)   | Cd(1)-N(1) <sup>#1</sup>                     | 2.270(4)   | Cd(1)-C(1) <sup>#1</sup>                     | 2.712(5)   |  |
|          | Cd(1)-O(2) <sup>#1</sup>                                                 | 2.302(4)   | Cd(1)-O(2)                                   | 2.302(4)   | Cd(1)-C(1)                                   | 2.712(5)   |  |
|          | Cd(1)-O(1) <sup>#1</sup>                                                 | 2.412(4)   | Cd(1)-O(1)                                   | 2.412(4)   |                                              |            |  |
|          | N(1)-Cd(1)-N(1) <sup>#1</sup>                                            | 92.5(2)    | N(1)-Cd(1)-O(2) <sup>#1</sup>                | 98.97(17)  | O(2)-Cd(1)-C(1) <sup>#1</sup>                | 90.14(17)  |  |
|          | N(1) <sup>#1</sup> -Cd(1)-O(2) <sup>#1</sup>                             | 147.75(16) | N(1)-Cd(1)-O(2)                              | 147.75(16) | O(1)-Cd(1)-C(1) <sup>#1</sup>                | 119.30(17) |  |
|          | N(1) <sup>#1</sup> -Cd(1)-O(2)                                           | 98.97(17)  | O(2) <sup>#1</sup> -Cd(1)-O(2)               | 87.2(3)    | N(1) <sup>#1</sup> -Cd(1)-C(1)               | 109.84(17) |  |
|          | N(1)-Cd(1)-O(1) <sup>#1</sup>                                            | 113.61(16) | N(1) <sup>#1</sup> -Cd(1)-O(1) <sup>#1</sup> | 92.73(15)  | O(2)-Cd(1)-C(1)                              | 27.45(15)  |  |
|          | O(2) <sup>#1</sup> -Cd(1)-O(1) <sup>#1</sup>                             | 55.06(14)  | O(2)-Cd(1)-O(1) <sup>#1</sup>                | 95.95(16)  | O(1)-Cd(1)-C(1)                              | 27.71(15)  |  |
|          | N(1)-Cd(1)-O(1)                                                          | 92.73(15)  | N(1) <sup>#1</sup> -Cd(1)-O(1)               | 113.61(16) | O(1) <sup>#1</sup> -Cd(1)-C(1) <sup>#1</sup> | 27.71(15)  |  |
|          | O(2) <sup>#1</sup> -Cd(1)-O(1)                                           | 95.95(16)  | O(2)-Cd(1)-O(1)                              | 55.06(14)  | N(1)-Cd(1)-C(1)                              | 120.42(16) |  |
|          | O(1) <sup>#1</sup> -Cd(1)-O(1)                                           | 142.2(2)   | N(1)-Cd(1)-C(1) <sup>#1</sup>                | 109.84(17) | O(2) <sup>#1</sup> -Cd(1)-C(1)               | 90.14(17)  |  |
|          | N(1) <sup>#1</sup> -Cd(1)-C(1) <sup>#1</sup>                             | 120.42(16) | O(2) <sup>#1</sup> -Cd(1)-C(1) <sup>#1</sup> | 27.45(15)  | O(1) <sup>#1</sup> -Cd(1)-C(1)               | 119.30(17) |  |
|          | C(1) <sup>#1</sup> -Cd(1)-C(1)                                           | 104.6(2)   |                                              |            |                                              |            |  |
|          | Symmetry code: #1 -x, y, -z+1/2; #2 x-1/2, y+1/2, z; #3 x+1/2, y-1/2, z. |            |                                              |            |                                              |            |  |

**Table S2.** Hydrogen bonding geometry (Å, °) for compounds **1 - 4**.

|                                                     | D-H1...A                  | D-H     | H...A   | D...A    | D-H1...A |
|-----------------------------------------------------|---------------------------|---------|---------|----------|----------|
| <b>1</b>                                            | N4-H1 ...N1 <sup>I</sup>  | 0.83(4) | 2.08(5) | 2.907(4) | 178(4)   |
|                                                     | N2-H3 ...O4 <sup>II</sup> | 0.89(6) | 2.22(6) | 3.086(5) | 164(5)   |
|                                                     | N4-H2... O3               | 0.78(5) | 2.10(5) | 2.863(5) | 167(5)   |
| Symmetry code:(I) -x+1, -y+1, -z+2; (II) x, y, z+1. |                           |         |         |          |          |
| <b>2</b>                                            | N2-H2A...O1 <sup>I</sup>  | 0.88    | 2.01    | 2.857(6) | 162.4    |
|                                                     | N2-H2B...O2 <sup>II</sup> | 0.88    | 2.01    | 2.781(6) | 145.8    |
| (I)x-1/2, y+1/2, z; x-1/2, (II)-y+1/2, z-1/2.       |                           |         |         |          |          |

**Table S3.** Photoluminescent data for ABTC in DMSO and compounds **1-4** in the solid state.

| compound | excitation $\lambda/\text{nm}$ | emission $\lambda/\text{nm}$ |
|----------|--------------------------------|------------------------------|
| <b>1</b> | 354                            | 425                          |
| <b>2</b> | 365                            | 443                          |

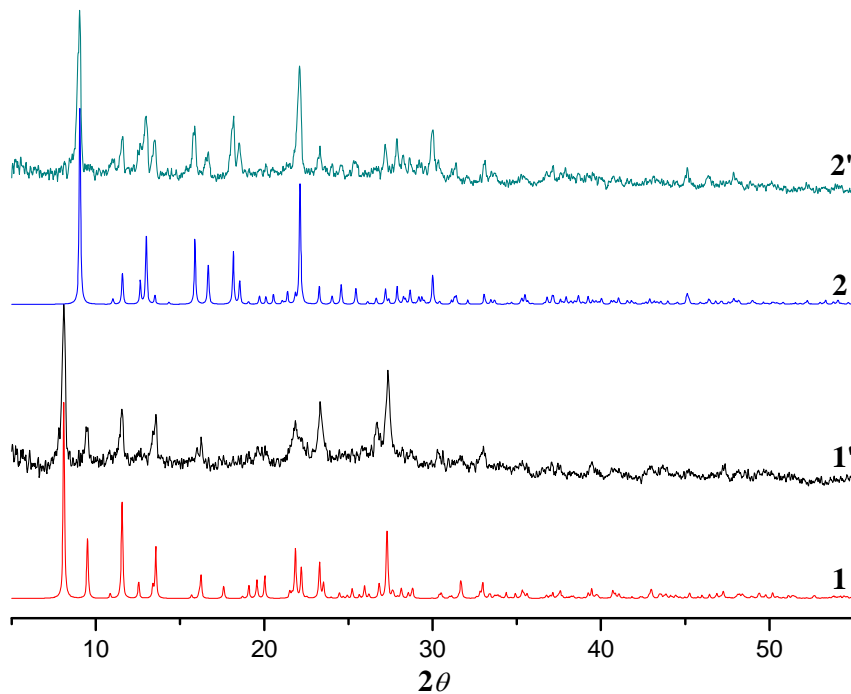

**Figure S1.** X-ray powder diffraction patterns for compounds **1** and **2**: complex **a**, simulated from single-crystal X-ray data; complex **a'**, experimental data.

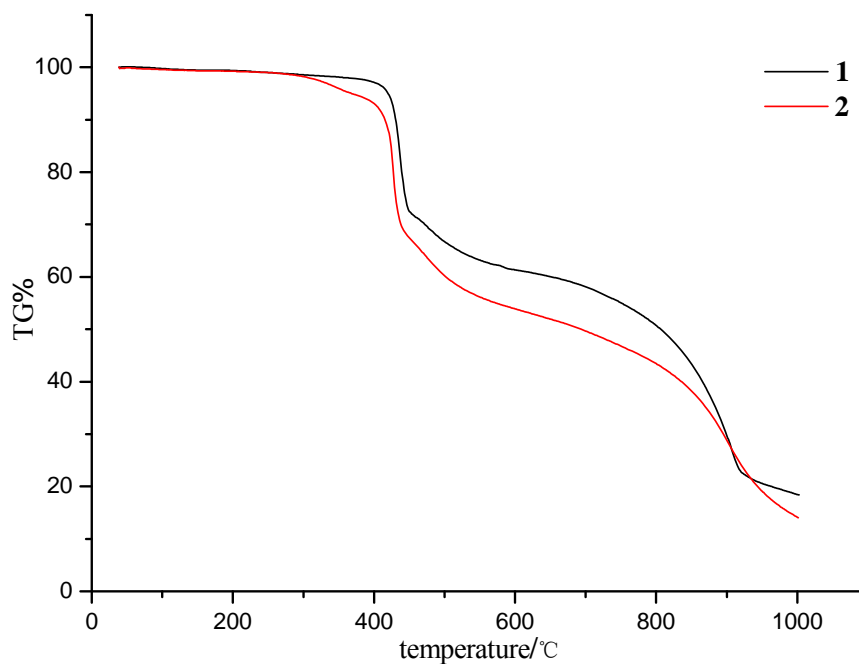

**Figure S2.** TGA profiles for compounds **1** and **2**.

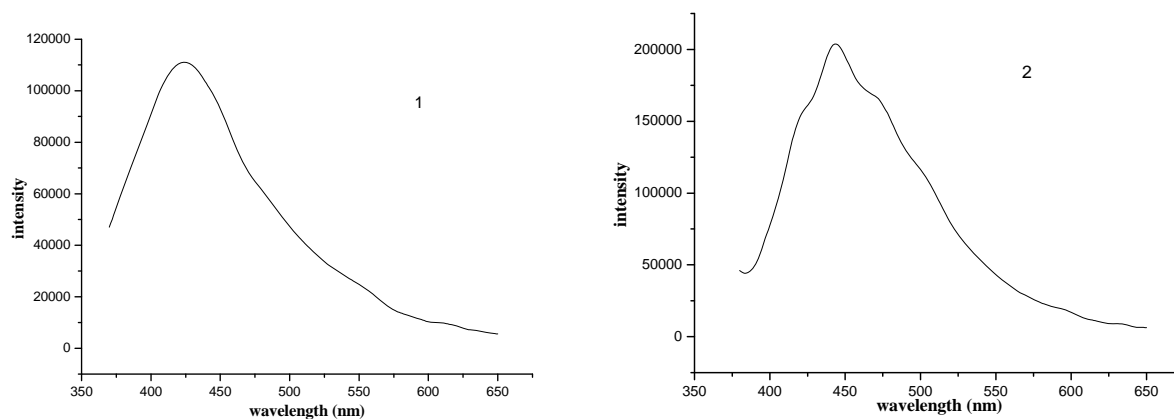

**Figure S3.** Emission spectrum of compounds 1 and 2 in solid state and ABTC in solution at room temperature

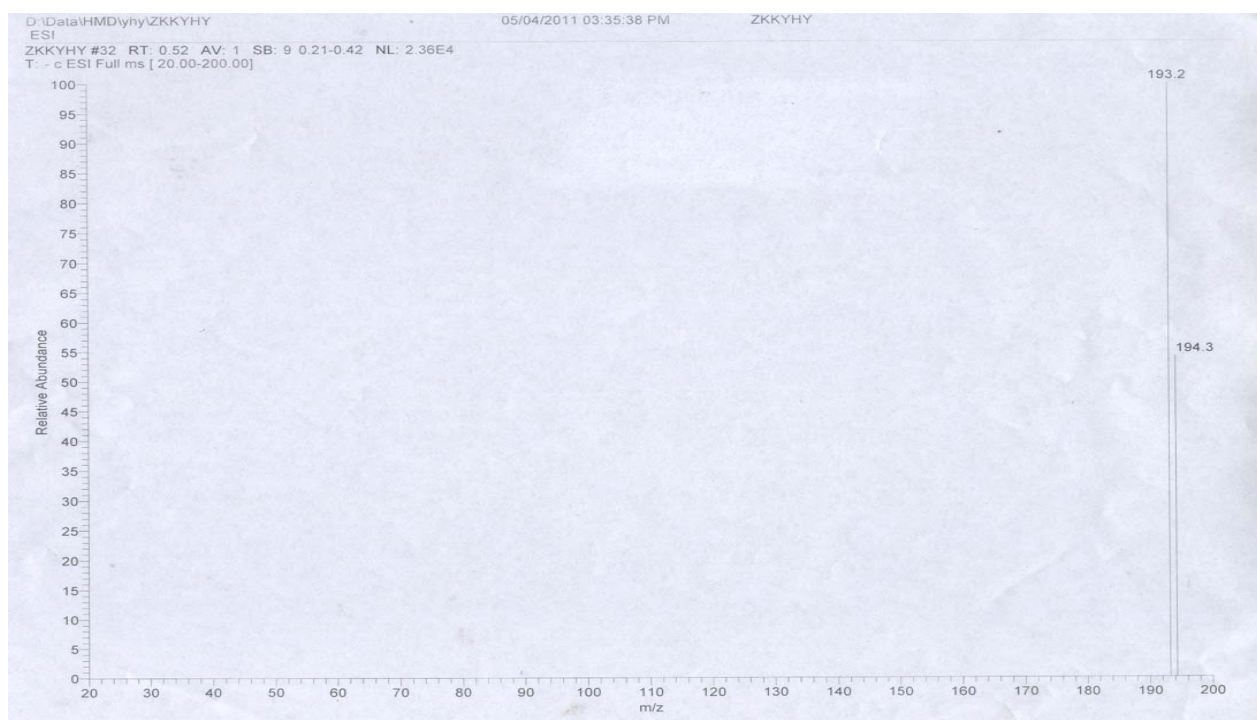

**Figure S4.** Mass spectra of ABTC

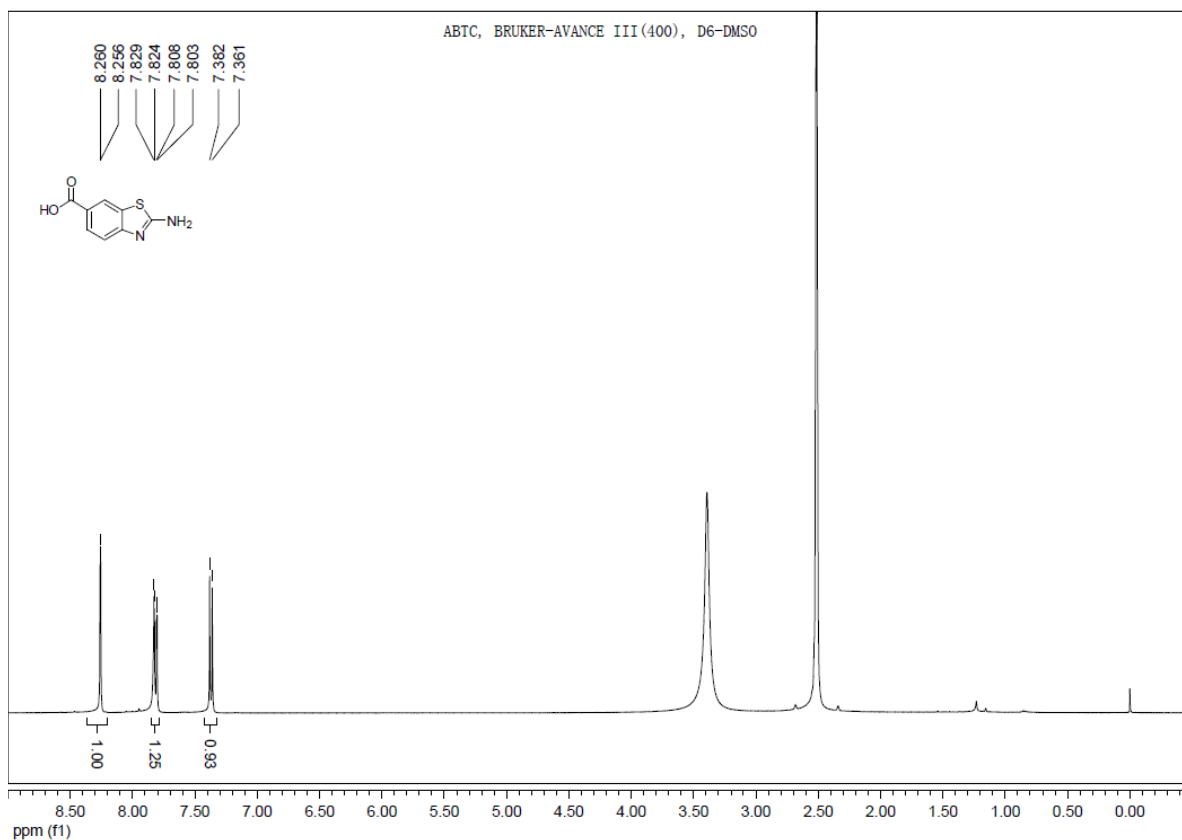

Figure S5. <sup>1</sup>H NMR of ABTC

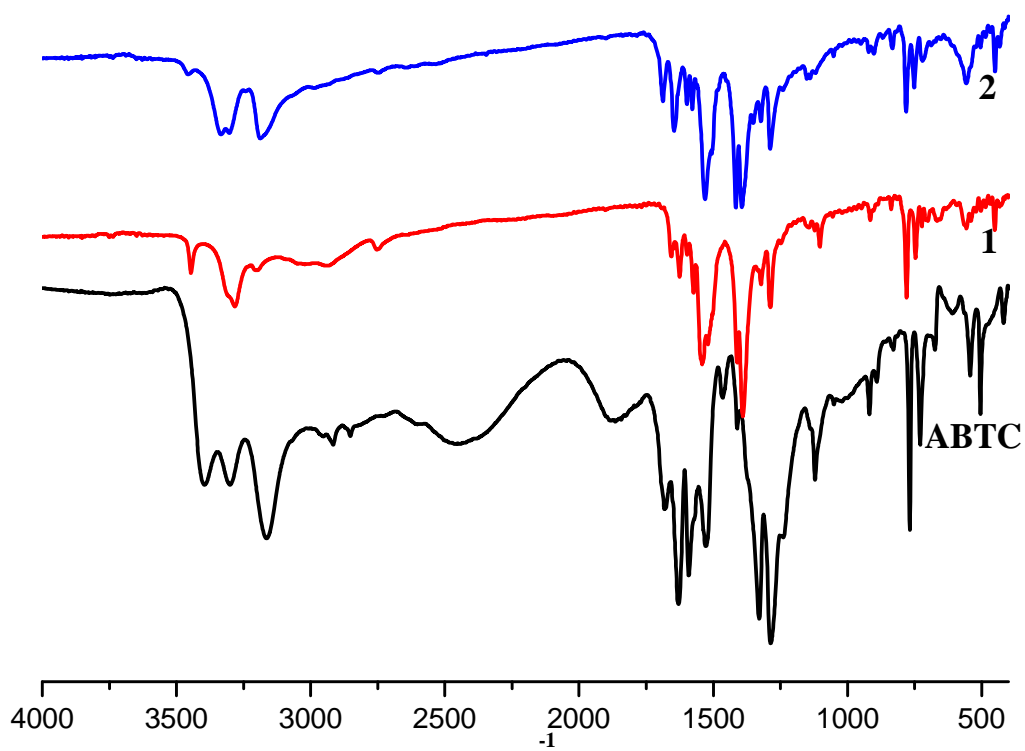

Figure S6. FT-IR of ABTC and compounds 1 and 2
